# Supplementary material for: Perceptions and satisfaction of a mandatory continuing professional development programme amongst Aotearoa New Zealand podiatrists
Source: Springer Nature journal article supplement (doi:10.1186/s13047-021-00492-6), 2021-01-01

# Perceptions and satisfaction of a mandatory continuing professional development programme amongst Aotearoa New Zealand podiatrists

Additional File 1: Overview of the PBNZ CPD recertification framework for NZ podiatrists

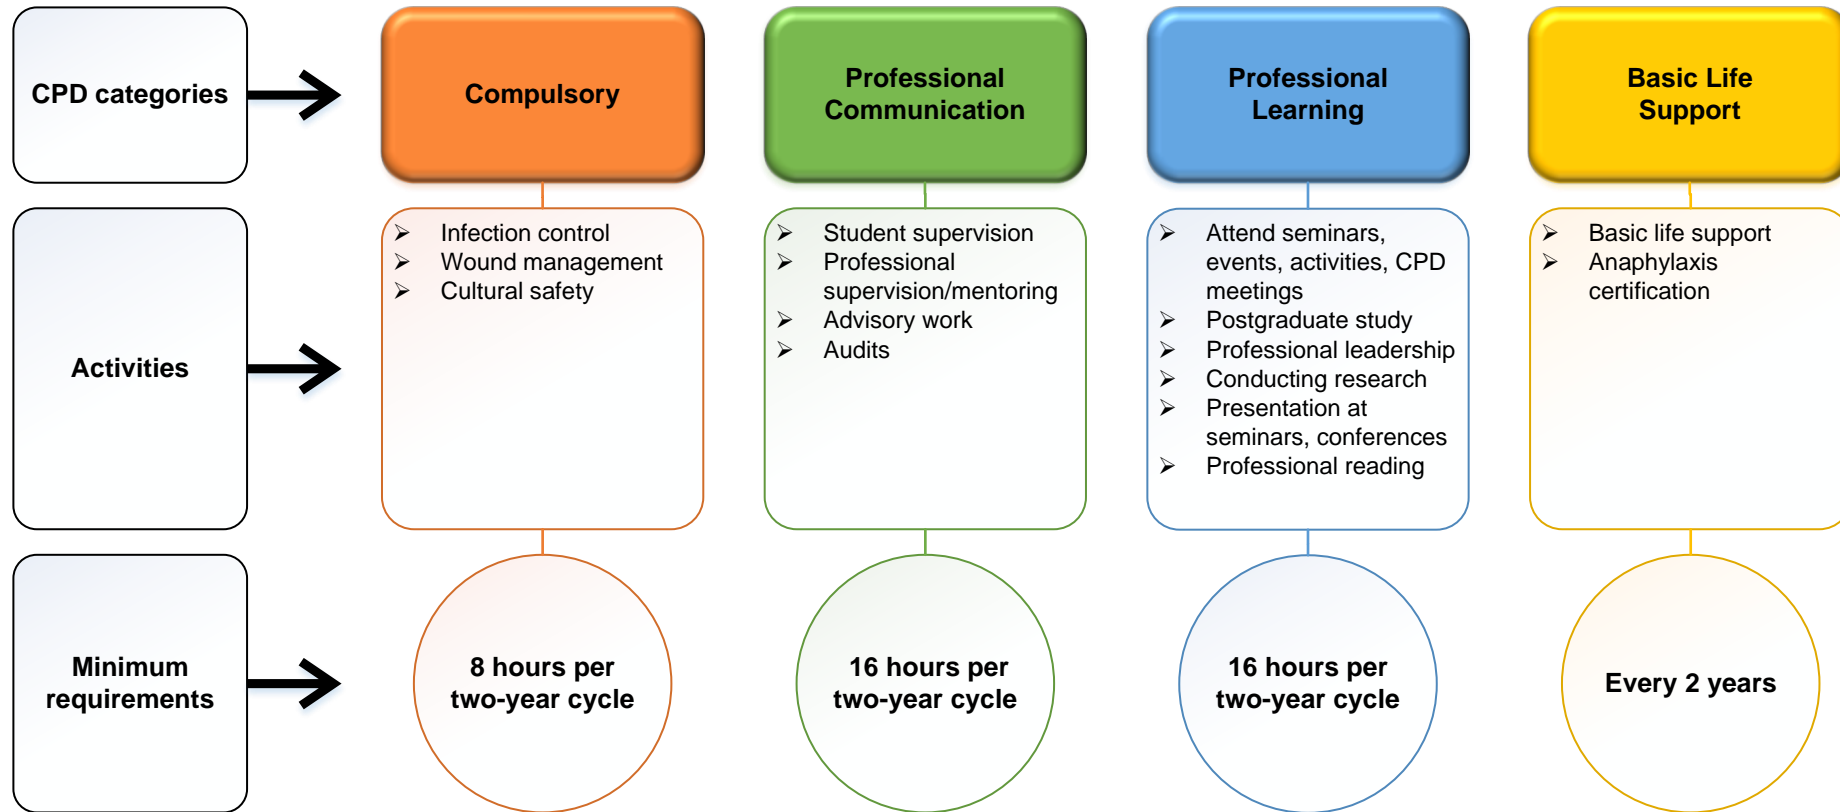

Supplement: MOESM1 [file 19645382]
